# Supplementary material for: Structural transformations from a 1-D chain to two 3-D supramolecular isomers via crystal disassembly and reassembly
Source: Royal Society of Chemistry journal article supplement (doi:10.1039/b717297d), 2008-01-01
Supplement: b717297d.pdf [file b717297d.pdf]

## Structural Transformations From 1D Chain to Two 3D Supramolecular Isomers Via Crystal Disassembly and Reassembly

Yue-Ling Bai, Jun Tao,\* Rong-Bin Huang, and Lan-Sun Zheng

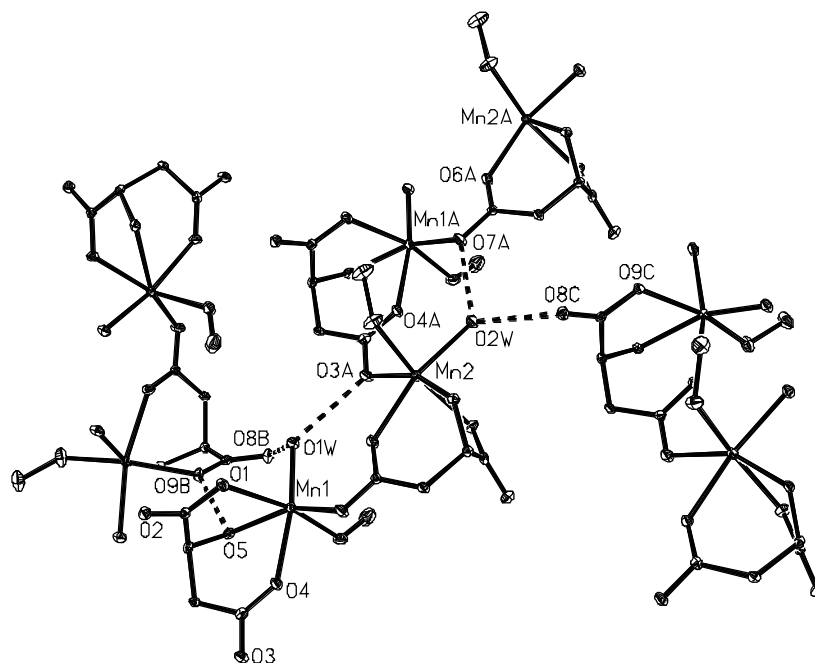

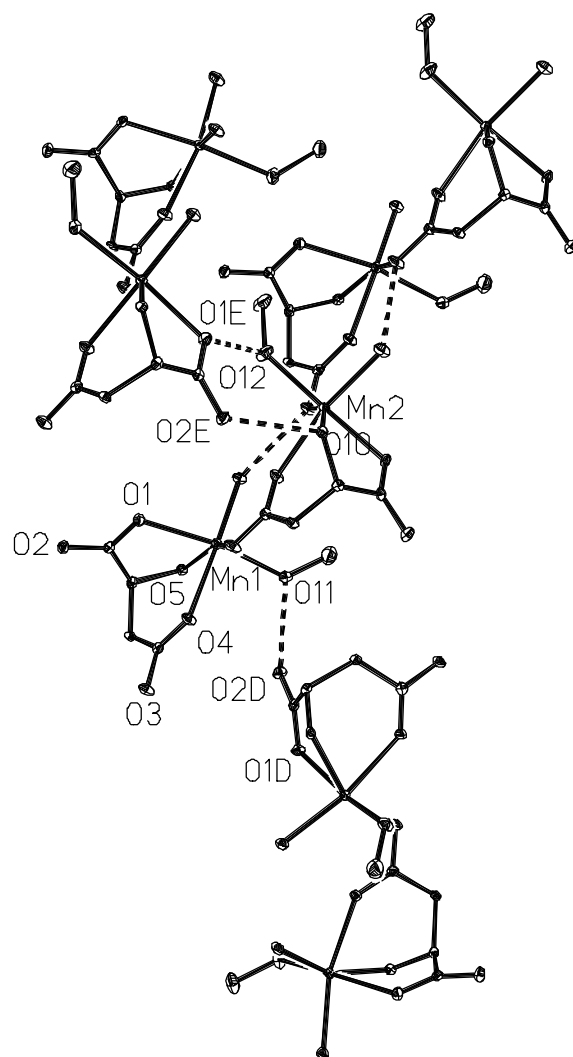

**Figure S1.** Three-dimensional hydrogen-bonded network of **1** viewed down to *a* axis (top) and of **2a** (middle) and **2b** (bottom) viewed down to *c* axis.

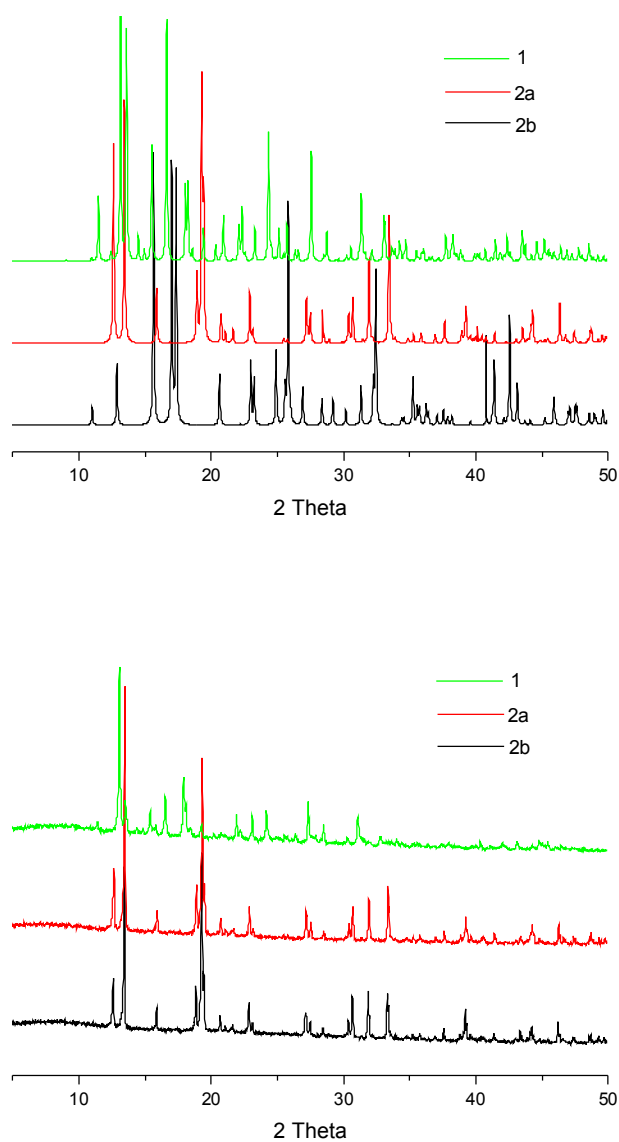

**Figure S2.** The patterns of XRPD of **1**, **2a** and **2b**, simulated patterns (top) and diffractive patterns (bottom).

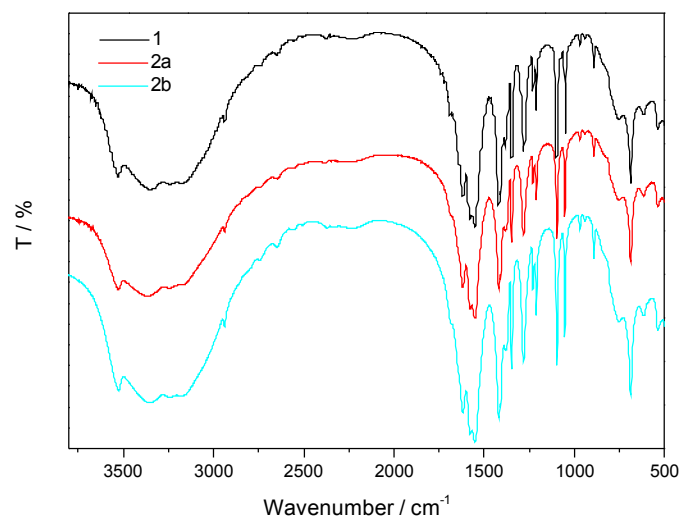

**Figure S3.** Infrared spectra of **1**, **2a** and **2b**.
